# Supplementary material for: Juvenile Atlantic herring (Clupea harengus) use a time-compensated sun compass for orientation
Source: Oxford University Press journal article supplement (doi:10.1242/jeb.244607), 2022-08-23
Supplement: jeb244607supp.pdf [file jeb244607supp.pdf]

**Table S1.** Length of mean vector (r) and standard error (SE) of experimental runs in different cloudiness categories.

| Categories  | 1            | 2            | 3           | 4            | 5            | 6            |
|-------------|--------------|--------------|-------------|--------------|--------------|--------------|
| Cloudiness  | 0-20%        | >20-40%      | >40-60%     | >60-80%      | 80-100%      | 100%         |
| Mean r ± SE | 0.439 ± 0.04 | 0.333 ± 0.03 | 0.34 ± 0.03 | 0.320 ± 0.02 | 0.286 ± 0.01 | 0.246 ± 0.05 |

**Table S2.** Raw data sun compass group

| Fish # | Mean Vector(μ) | Length of Mean Vector(r) | r logit transformed | Concentration | Circular Variance | Circular Standard Deviation | Rayleigh Test(Z) | Rayleigh Test(p) | Cloudiness |
|--------|----------------|--------------------------|---------------------|---------------|-------------------|-----------------------------|------------------|------------------|------------|
| 2      | 45,514°        | 0,639                    | 0,57                | 1,677         | 0,361             | 54,266°                     | 16,311           | 2,34E-08         | 50         |
| 2      | 328,358°       | 0,409                    | -0,37               | 0,895         | 0,591             | 76,654°                     | 6,679            | 1,00E-03         | 50         |
| 2      | 100,049°       | 0,647                    | 0,61                | 1,716         | 0,353             | 53,496°                     | 16,729           | 1,61E-08         | 60         |
| 2      | 101,024°       | 0,681                    | 0,76                | 1,893         | 0,319             | 50,249°                     | 18,536           | 3,89E-09         | 30         |
| 2      | 123,21°        | 0,628                    | 0,52                | 1,627         | 0,372             | 55,297°                     | 15,759           | 3,93E-08         | 20         |
| 2      | 305,461°       | 0,041                    | -3,15               | 0,083         | 0,959             | 144,547°                    | 0,069            | 9,34E-01         | 90         |
| 3      | 106,077°       | 0,645                    | 0,60                | 1,71          | 0,355             | 53,612°                     | 16,665           | 1,70E-08         | 40         |
| 3      | 92,559°        | 0,589                    | 0,36                | 1,467         | 0,411             | 58,912°                     | 13,897           | 2,83E-07         | 50         |
| 3      | 295,096°       | 0,324                    | -0,74               | 0,685         | 0,676             | 86°                         | 4,204            | 1,40E-02         | 70         |
| 3      | 236,669°       | 0,237                    | -1,17               | 0,489         | 0,763             | 97,161°                     | 2,255            | 1,04E-01         | 20         |
| 3      | 90,185°        | 0,613                    | 0,46                | 1,561         | 0,387             | 56,722°                     | 15,011           | 8,38E-08         | 50         |
| 3      | 139,189°       | 0,263                    | -1,03               | 0,544         | 0,737             | 93,706°                     | 2,757            | 6,30E-02         | 90         |
| 6      | 119,974°       | 0,634                    | 0,55                | 1,657         | 0,366             | 54,689°                     | 16,083           | 2,88E-08         | 50         |
| 6      | 34,77°         | 0,243                    | -1,14               | 0,502         | 0,757             | 96,343°                     | 2,367            | 9,30E-02         | 50         |
| 6      | 307,05°        | 0,564                    | 0,26                | 1,372         | 0,436             | 61,278°                     | 12,744           | 1,06E-06         | 40         |
| 6      | 25,645°        | 0,177                    | -1,54               | 0,36          | 0,823             | 106,58°                     | 1,257            | 2,86E-01         | 50         |
| 6      | 38,818°        | 0,244                    | -1,13               | 0,503         | 0,756             | 96,241°                     | 2,381            | 9,20E-02         | 70         |
| 6      | 330,96°        | 0,119                    | -2,00               | 0,239         | 0,881             | 118,268°                    | 0,564            | 5,72E-01         | 70         |
| 9      | 164,078°       | 0,752                    | 1,11                | 2,376         | 0,248             | 43,299°                     | 22,596           | 2,19E-10         | 40         |
| 9      | 166,551°       | 0,275                    | -0,97               | 0,572         | 0,725             | 92,048°                     | 3,028            | 4,70E-02         | 40         |
| 9      | 83,631°        | 0,768                    | 1,20                | 2,525         | 0,232             | 41,582°                     | 23,622           | 1,03E-10         | 40         |
| 9      | 102,487°       | 0,46                     | -0,16               | 1,034         | 0,54              | 71,427°                     | 8,455            | 1,44E-04         | 50         |
| 9      | 33,282°        | 0,168                    | -1,60               | 0,34          | 0,832             | 108,254°                    | 1,126            | 3,26E-01         | 60         |
| 9      | 276,142°       | 0,195                    | -1,42               | 0,397         | 0,805             | 103,673°                    | 1,514            | 2,21E-01         | 90         |
| 11     | 35,78°         | 0,668                    | 0,70                | 1,824         | 0,332             | 51,466°                     | 17,85            | 6,49E-09         | 70         |
| 11     | 235,292°       | 0,276                    | -0,96               | 0,573         | 0,724             | 91,996°                     | 3,037            | 4,70E-02         | 70         |
| 11     | 323,239°       | 0,64                     | 0,58                | 1,684         | 0,36              | 54,124°                     | 16,388           | 2,18E-08         | 60         |
| 11     | 71,817°        | 0,637                    | 0,56                | 1,67          | 0,363             | 54,413°                     | 16,232           | 2,51E-08         | 40         |
| 11     | 114,684°       | 0,581                    | 0,33                | 1,435         | 0,419             | 59,684°                     | 13,515           | 4,37E-07         | 70         |
| 11     | 146,07°        | 0,236                    | -1,17               | 0,486         | 0,764             | 97,325°                     | 2,233            | 1,07E-01         | 100        |
| 13     | 95,136°        | 0,704                    | 0,87                | 2,033         | 0,296             | 47,977°                     | 19,84            | 1,54E-09         | 40         |
| 13     | 145,089°       | 0,264                    | -1,03               | 0,548         | 0,736             | 93,5°                       | 2,789            | 6,10E-02         | 50         |
| 13     | 337,602°       | 0,124                    | -1,96               | 0,25          | 0,876             | 117,051°                    | 0,616            | 5,43E-01         | 50         |
| 13     | 167,702°       | 0,245                    | -1,13               | 0,505         | 0,755             | 96,124°                     | 2,397            | 9,00E-02         | 70         |
| 13     | 294,014°       | 0,137                    | -1,84               | 0,277         | 0,863             | 114,237°                    | 0,751            | 4,75E-01         | 90         |
| 13     | 72,085°        | 0,11                     | -2,09               | 0,221         | 0,89              | 120,429°                    | 0,482            | 6,20E-01         | 90         |
| 14     | 59,587°        | 0,152                    | -1,72               | 0,307         | 0,848             | 111,246°                    | 0,922            | 4,00E-01         | 50         |
| 14     | 50,067°        | 0,481                    | -0,08               | 1,095         | 0,519             | 69,306°                     | 9,26             | 5,87E-05         | 50         |
| 14     | 104,373°       | 0,392                    | -0,44               | 0,851         | 0,608             | 78,458°                     | 6,134            | 2,00E-03         | 50         |
| 14     | 83,354°        | 0,28                     | -0,94               | 0,584         | 0,72              | 91,381°                     | 3,143            | 4,20E-02         | 70         |
| 14     | 153,201°       | 0,382                    | -0,48               | 0,827         | 0,618             | 79,488°                     | 4,816            | 7,00E-03         | 90         |
| 14     | 138,356°       | 0,435                    | -0,26               | 0,966         | 0,565             | 73,896°                     | 7,58             | 3,80E-04         | 100        |
| 15     | 5,977°         | 0,525                    | 0,10                | 1,227         | 0,475             | 65,06°                      | 11,018           | 7,88E-06         | 40         |
| 15     | 281,283°       | 0,639                    | 0,57                | 1,681         | 0,361             | 54,188°                     | 16,353           | 2,25E-08         | 60         |
| 15     | 139,407°       | 0,189                    | -1,46               | 0,385         | 0,811             | 104,613°                    | 1,426            | 2,41E-01         | 50         |
| 15     | 162,463°       | 0,234                    | -1,19               | 0,481         | 0,766             | 97,694°                     | 2,185            | 1,12E-01         | 60         |
| 15     | 182,749°       | 0,15                     | -1,73               | 0,303         | 0,85              | 111,656°                    | 0,897            | 4,10E-01         | 90         |
| 15     | 228,544°       | 0,103                    | -2,16               | 0,208         | 0,897             | 122,055°                    | 0,428            | 6,55E-01         | 100        |
| 17     | 217,526°       | 0,16                     | -1,66               | 0,325         | 0,84              | 109,632°                    | 1,028            | 3,60E-01         | 40         |

|    |          |       |       |       |       |          |        |          |     |
|----|----------|-------|-------|-------|-------|----------|--------|----------|-----|
| 17 | 46,372°  | 0,139 | -1,82 | 0,28  | 0,861 | 113,867° | 0,771  | 4,66E-01 | 50  |
| 17 | 25,558°  | 0,271 | -0,99 | 0,564 | 0,729 | 92,538°  | 2,946  | 5,20E-02 | 50  |
| 17 | 14,825°  | 0,081 | -2,43 | 0,162 | 0,919 | 128,495° | 0,262  | 7,72E-01 | 60  |
| 17 | 69,184°  | 0,145 | -1,77 | 0,292 | 0,855 | 112,659° | 0,837  | 4,35E-01 | 90  |
| 17 | 12,576°  | 0,285 | -0,92 | 0,594 | 0,715 | 90,817°  | 3,243  | 3,80E-02 | 100 |
| 19 | 340,356° | 0,077 | -2,48 | 0,155 | 0,923 | 129,609° | 0,24   | 7,89E-01 | 50  |
| 19 | 126,421° | 0,225 | -1,24 | 0,462 | 0,775 | 98,931°  | 2,029  | 1,31E-01 | 60  |
| 19 | 82,957°  | 0,169 | -1,59 | 0,342 | 0,831 | 108,12°  | 1,136  | 3,23E-01 | 40  |
| 19 | 345,744° | 0,088 | -2,34 | 0,176 | 0,912 | 126,358° | 0,309  | 7,37E-01 | 30  |
| 19 | 290,807° | 0,086 | -2,36 | 0,173 | 0,914 | 126,895° | 0,296  | 7,46E-01 | 60  |
| 19 | 65,045°  | 0,096 | -2,24 | 0,193 | 0,904 | 124,052° | 0,368  | 6,95E-01 | 60  |
| 22 | 58,692°  | 0,523 | 0,09  | 1,223 | 0,477 | 65,208°  | 10,953 | 8,49E-06 | 40  |
| 22 | 133,313° | 0,319 | -0,76 | 0,673 | 0,681 | 86,648°  | 4,063  | 1,60E-02 | 40  |
| 22 | 105,678° | 0,268 | -1,00 | 0,556 | 0,732 | 92,977°  | 2,874  | 5,60E-02 | 80  |
| 22 | 173,632° | 0,272 | -0,98 | 0,566 | 0,728 | 92,422°  | 2,965  | 5,10E-02 | 80  |
| 22 | 169,566° | 0,318 | -0,76 | 0,672 | 0,682 | 86,681°  | 4,056  | 1,60E-02 | 60  |
| 22 | 62,209°  | 0,083 | -2,40 | 0,166 | 0,917 | 127,92°  | 0,274  | 7,63E-01 | 70  |
| 25 | 260,457° | 0,219 | -1,27 | 0,449 | 0,781 | 99,877°  | 1,916  | 1,47E-01 | 70  |
| 25 | 82,338°  | 0,07  | -2,59 | 0,141 | 0,93  | 132,006° | 0,198  | 8,22E-01 | 100 |
| 25 | 254,03°  | 0,475 | -0,10 | 1,078 | 0,525 | 69,888°  | 9,034  | 7,56E-05 | 70  |
| 25 | 166,292° | 0,513 | 0,05  | 1,191 | 0,487 | 66,198°  | 10,527 | 1,39E-05 | 60  |
| 25 | 150,568° | 0,231 | -1,20 | 0,476 | 0,769 | 98,025°  | 2,142  | 1,17E-01 | 20  |
| 25 | 277,343° | 0,673 | 0,72  | 1,85  | 0,327 | 51,007°  | 18,108 | 5,34E-09 | 85  |
| 26 | 72,69°   | 0,505 | 0,02  | 1,167 | 0,495 | 66,947°  | 10,213 | 1,99E-05 | 70  |
| 26 | 124,194° | 0,13  | -1,90 | 0,263 | 0,87  | 115,692° | 0,678  | 5,10E-01 | 100 |
| 26 | 16,44°   | 0,627 | 0,52  | 1,622 | 0,373 | 55,403°  | 15,703 | 4,15E-08 | 70  |
| 26 | 54,831°  | 0,464 | -0,14 | 1,047 | 0,536 | 70,955°  | 8,63   | 1,19E-04 | 50  |
| 26 | 50,775°  | 0,217 | -1,28 | 0,444 | 0,783 | 100,173° | 1,882  | 1,53E-01 | 20  |
| 26 | 110,421° | 0,269 | -1,00 | 0,558 | 0,731 | 92,874°  | 2,89   | 5,50E-02 | 85  |
| 30 | 93,949°  | 0,401 | -0,40 | 0,875 | 0,599 | 77,455°  | 6,433  | 1,00E-03 | 70  |
| 30 | 70,642°  | 0,164 | -1,63 | 0,333 | 0,836 | 108,899° | 1,079  | 3,42E-01 | 100 |
| 30 | 122,67°  | 0,841 | 1,67  | 3,475 | 0,159 | 33,706°  | 28,298 | 2,75E-12 | 60  |
| 30 | 293,441° | 0,205 | -1,36 | 0,418 | 0,795 | 102,078° | 1,673  | 1,88E-01 | 60  |
| 30 | 105,196° | 0,217 | -1,28 | 0,445 | 0,783 | 100,159° | 1,883  | 1,52E-01 | 10  |
| 30 | 221,628° | 0,594 | 0,38  | 1,483 | 0,406 | 58,524°  | 14,091 | 2,28E-07 | 90  |
| 31 | 193,376° | 0,138 | -1,83 | 0,278 | 0,862 | 114,108° | 0,758  | 4,72E-01 | 70  |
| 31 | 3,675°   | 0,17  | -1,59 | 0,345 | 0,83  | 107,836° | 1,158  | 3,16E-01 | 100 |
| 31 | 283,049° | 0,079 | -2,46 | 0,159 | 0,921 | 128,95°  | 0,253  | 7,79E-01 | 60  |
| 31 | 348,102° | 0,303 | -0,83 | 0,635 | 0,697 | 88,574°  | 3,666  | 2,50E-02 | 80  |
| 31 | 354,795° | 0,274 | -0,97 | 0,571 | 0,726 | 92,14°   | 3,012  | 4,80E-02 | 30  |
| 31 | 324,93°  | 0,334 | -0,69 | 0,71  | 0,666 | 84,808°  | 4,472  | 1,10E-02 | 80  |
| 32 | 318,65°  | 0,12  | -1,99 | 0,241 | 0,88  | 118,027° | 0,574  | 5,66E-01 | 80  |
| 32 | 8,76°    | 0,051 | -2,92 | 0,102 | 0,949 | 139,775° | 0,104  | 9,02E-01 | 100 |
| 32 | 11,777°  | 0,325 | -0,73 | 0,688 | 0,675 | 85,886°  | 4,229  | 1,40E-02 | 60  |
| 32 | 181,76°  | 0,195 | -1,42 | 0,397 | 0,805 | 103,626° | 1,519  | 2,20E-01 | 80  |
| 32 | 141,14°  | 0,153 | -1,71 | 0,31  | 0,847 | 110,947° | 0,941  | 3,93E-01 | 20  |
| 32 | 347,012° | 0,348 | -0,63 | 0,743 | 0,652 | 83,226°  | 4,85   | 7,00E-03 | 85  |
| 33 | 314,517° | 0,173 | -1,56 | 0,351 | 0,827 | 107,36°  | 1,195  | 3,05E-01 | 80  |
| 33 | 35,068°  | 0,138 | -1,83 | 0,278 | 0,862 | 114,121° | 0,757  | 4,72E-01 | 100 |
| 33 | 69,264°  | 0,063 | -2,70 | 0,126 | 0,937 | 134,724° | 0,159  | 8,55E-01 | 60  |
| 33 | 64,407°  | 0,559 | 0,24  | 1,352 | 0,441 | 61,798°  | 12,498 | 1,41E-06 | 80  |
| 33 | 129,275° | 0,107 | -2,12 | 0,216 | 0,893 | 121,078° | 0,46   | 6,34E-01 | 20  |
| 33 | 64,273°  | 0,035 | -3,32 | 0,07  | 0,965 | 148,217° | 0,05   | 9,52E-01 | 90  |
| 34 | 108,418° | 0,242 | -1,14 | 0,498 | 0,758 | 96,58°   | 2,334  | 9,60E-02 | 100 |
| 34 | 355,718° | 0,109 | -2,10 | 0,219 | 0,891 | 120,723° | 0,472  | 6,27E-01 | 100 |
| 34 | 152,505° | 0,468 | -0,13 | 1,058 | 0,532 | 70,577°  | 8,772  | 1,02E-04 | 60  |
| 34 | 141,621° | 0,28  | -0,94 | 0,584 | 0,72  | 91,412°  | 3,138  | 4,20E-02 | 80  |
| 34 | 128,107° | 0,484 | -0,06 | 1,104 | 0,516 | 69,003°  | 9,379  | 5,13E-05 | 20  |
| 34 | 331,043° | 0,076 | -2,50 | 0,153 | 0,924 | 129,938° | 0,234  | 7,94E-01 | 90  |
| 35 | 214,124° | 0,161 | -1,65 | 0,326 | 0,839 | 109,501° | 1,037  | 3,57E-01 | 100 |
| 35 | 254,995° | 0,283 | -0,93 | 0,59  | 0,717 | 91,063°  | 3,199  | 4,00E-02 | 100 |
| 35 | 285,762° | 0,479 | -0,08 | 1,088 | 0,521 | 69,542°  | 9,168  | 6,51E-05 | 60  |
| 35 | 121,59°  | 0,14  | -1,82 | 0,283 | 0,86  | 113,608° | 0,784  | 4,59E-01 | 30  |
| 35 | 136,139° | 0,262 | -1,04 | 0,542 | 0,738 | 93,839°  | 2,736  | 6,40E-02 | 20  |
| 35 | 179,375° | 0,333 | -0,69 | 0,707 | 0,667 | 84,92°   | 4,447  | 1,10E-02 | 95  |
| 36 | 197,667° | 0,267 | -1,01 | 0,554 | 0,733 | 93,116°  | 2,851  | 5,70E-02 | 100 |
| 36 | 59,349°  | 0,259 | -1,05 | 0,536 | 0,741 | 94,229°  | 2,675  | 6,80E-02 | 100 |
| 36 | 99,042°  | 0,09  | -2,31 | 0,181 | 0,91  | 125,704° | 0,325  | 7,25E-01 | 60  |
| 36 | 288,604° | 0,141 | -1,81 | 0,284 | 0,859 | 113,45°  | 0,793  | 4,55E-01 | 40  |
| 36 | 134,048° | 0,315 | -0,78 | 0,664 | 0,685 | 87,096°  | 3,967  | 1,80E-02 | 25  |

|    |          |       |       |        |       |          |        |          |     |
|----|----------|-------|-------|--------|-------|----------|--------|----------|-----|
| 36 | 356,47°  | 0,13  | -1,90 | 0,263  | 0,87  | 115,633° | 0,681  | 5,09E-01 | 95  |
| 38 | 285,853° | 0,736 | 1,03  | 2,255  | 0,264 | 44,814°  | 21,696 | 4,18E-10 | 100 |
| 38 | 324,298° | 0,133 | -1,87 | 0,269  | 0,867 | 115,047° | 0,71   | 4,95E-01 | 100 |
| 38 | 276,589° | 0,497 | -0,01 | 1,142  | 0,503 | 67,749°  | 9,882  | 2,90E-05 | 70  |
| 38 | 273,685° | 0,838 | 1,64  | 3,418  | 0,162 | 34,073°  | 28,085 | 3,27E-12 | 20  |
| 38 | 291,032° | 0,095 | -2,25 | 0,191  | 0,905 | 124,359° | 0,36   | 7,00E-01 | 40  |
| 38 | 302,961° | 0,447 | -0,21 | 0,997  | 0,553 | 72,739°  | 7,982  | 2,44E-04 | 100 |
| 41 | 69,398°  | 0,586 | 0,35  | 1,452  | 0,414 | 59,259°  | 13,725 | 3,44E-07 | 100 |
| 41 | 258,618° | 0,291 | -0,89 | 0,609  | 0,709 | 89,966°  | 3,398  | 3,20E-02 | 90  |
| 41 | 209,607° | 0,168 | -1,60 | 0,34   | 0,832 | 108,3°   | 1,123  | 3,27E-01 | 70  |
| 41 | 68,113°  | 0,215 | -1,30 | 0,44   | 0,785 | 100,492° | 1,845  | 1,58E-01 | 30  |
| 41 | 164,94°  | 0,479 | -0,08 | 1,088  | 0,521 | 69,532°  | 9,172  | 6,48E-05 | 60  |
| 41 | 337,262° | 0,18  | -1,52 | 0,365  | 0,82  | 106,186° | 1,289  | 2,77E-01 | 95  |
| 42 | 142,6°   | 0,17  | -1,59 | 0,345  | 0,83  | 107,826° | 1,159  | 3,16E-01 | 100 |
| 42 | 176,174° | 0,157 | -1,68 | 0,317  | 0,843 | 110,305° | 0,983  | 3,77E-01 | 80  |
| 42 | 134,489° | 0,377 | -0,50 | 0,814  | 0,623 | 80,043°  | 5,682  | 3,00E-03 | 70  |
| 42 | 95,675°  | 0,219 | -1,27 | 0,449  | 0,781 | 99,879°  | 1,916  | 1,47E-01 | 10  |
| 42 | 120,745° | 0,074 | -2,53 | 0,148  | 0,926 | 130,831° | 0,218  | 8,06E-01 | 60  |
| 42 | 86,487°  | 0,063 | -2,70 | 0,126  | 0,937 | 134,837° | 0,157  | 8,56E-01 | 95  |
| 44 | 13,911°  | 0,059 | -2,77 | 0,119  | 0,941 | 136,178° | 0,141  | 8,70E-01 | 60  |
| 44 | 103,472° | 0,119 | -2,00 | 0,239  | 0,881 | 118,252° | 0,565  | 5,71E-01 | 20  |
| 45 | 175,415° | 0,034 | -3,35 | 0,067  | 0,966 | 149,218° | 0,045  | 9,56E-01 | 5   |
| 45 | 34,935°  | 0,559 | 0,24  | 1,35   | 0,441 | 61,84°   | 12,478 | 1,45E-06 | 10  |
| 45 | 12,534°  | 0,516 | 0,06  | 1,2    | 0,484 | 65,916°  | 10,648 | 1,21E-05 | 20  |
| 45 | 333,772° | 0,676 | 0,74  | 1,867  | 0,324 | 50,703°  | 18,279 | 4,70E-09 | 20  |
| 45 | 5,148°   | 0,433 | -0,27 | 0,96   | 0,567 | 74,111°  | 7,507  | 4,12E-04 | 40  |
| 45 | 297,681° | 0,328 | -0,72 | 0,695  | 0,672 | 85,517°  | 4,311  | 1,30E-02 | 40  |
| 51 | 150,303° | 0,16  | -1,66 | 0,324  | 0,84  | 109,715° | 1,022  | 3,62E-01 | 5   |
| 51 | 91,261°  | 0,188 | -1,46 | 0,384  | 0,812 | 104,672° | 1,421  | 2,43E-01 | 40  |
| 51 | 72,184°  | 0,203 | -1,37 | 0,414  | 0,797 | 102,377° | 1,642  | 1,94E-01 | 30  |
| 51 | 173,351° | 0,174 | -1,56 | 0,354  | 0,826 | 107,094° | 1,216  | 2,98E-01 | 30  |
| 51 | 135,719° | 0,121 | -1,98 | 0,245  | 0,879 | 117,658° | 0,59   | 5,57E-01 | 50  |
| 54 | 7,391°   | 0,246 | -1,12 | 0,508  | 0,754 | 95,908°  | 2,428  | 8,80E-02 | 0   |
| 54 | 325,764° | 0,365 | -0,55 | 0,784  | 0,635 | 81,353°  | 5,327  | 4,00E-03 | 20  |
| 54 | 108,535° | 0,342 | -0,65 | 0,727  | 0,658 | 83,984°  | 4,666  | 9,00E-03 | 10  |
| 54 | 131,819° | 0,328 | -0,72 | 0,695  | 0,672 | 85,54°   | 4,306  | 1,30E-02 | 30  |
| 54 | 175,726° | 0,304 | -0,83 | 0,638  | 0,696 | 88,45°   | 3,69   | 2,40E-02 | 50  |
| 54 | 42,101°  | 0,073 | -2,54 | 0,147  | 0,927 | 131,023° | 0,214  | 8,09E-01 | 50  |
| 54 | 69,526°  | 0,226 | -1,23 | 0,465  | 0,774 | 98,753°  | 2,051  | 1,29E-01 | 50  |
| 55 | 187,79°  | 0,797 | 1,37  | 2,824  | 0,203 | 38,614°  | 25,398 | 2,70E-11 | 5   |
| 55 | 16,259°  | 0,529 | 0,12  | 1,24   | 0,471 | 64,662°  | 11,192 | 6,44E-06 | 10  |
| 55 | 57,812°  | 0,365 | -0,55 | 0,785  | 0,635 | 81,305°  | 5,34   | 4,00E-03 | 5   |
| 55 | 86,835°  | 0,306 | -0,82 | 0,643  | 0,694 | 88,19°   | 3,742  | 2,30E-02 | 15  |
| 55 | 329,22°  | 0,429 | -0,29 | 0,95   | 0,571 | 74,52°   | 7,369  | 4,79E-04 | 30  |
| 56 | 74,163°  | 0,428 | -0,29 | 0,947  | 0,572 | 74,61°   | 7,339  | 4,95E-04 | 5   |
| 56 | 173,886° | 0,375 | -0,51 | 0,81   | 0,625 | 80,199°  | 5,638  | 3,00E-03 | 10  |
| 56 | 213,496° | 0,516 | 0,06  | 1,199  | 0,484 | 65,941°  | 10,637 | 1,22E-05 | 5   |
| 56 | 95,846°  | 0,16  | -1,66 | 0,323  | 0,84  | 109,761° | 1,019  | 3,63E-01 | 10  |
| 56 | 198,207° | 0,092 | -2,29 | 0,184  | 0,908 | 125,202° | 0,338  | 7,16E-01 | 30  |
| 56 | 283,858° | 0,124 | -1,96 | 0,251  | 0,876 | 116,988° | 0,619  | 5,42E-01 | 50  |
| 60 | 216,913° | 0,827 | 1,56  | 3,231  | 0,173 | 35,347°  | 27,338 | 5,93E-12 | 10  |
| 60 | 293,908° | 0,815 | 1,48  | 3,058  | 0,185 | 36,644°  | 26,572 | 1,09E-11 | 0   |
| 60 | 310,171° | 0,699 | 0,84  | 1,998  | 0,301 | 48,518°  | 19,528 | 1,92E-09 | 15  |
| 60 | 268,444° | 0,72  | 0,94  | 2,137  | 0,28  | 46,436°  | 20,74  | 8,22E-10 | 20  |
| 60 | 246,848° | 0,128 | -1,92 | 0,258  | 0,872 | 116,168° | 0,656  | 5,22E-01 | 30  |
| 60 | 256,197° | 0,051 | -2,92 | 0,103  | 0,949 | 139,607° | 0,106  | 9,01E-01 | 30  |
| 61 | 168,185° | 0,271 | -0,99 | 0,562  | 0,729 | 92,63°   | 2,93   | 5,20E-02 | 10  |
| 61 | 68,314°  | 0,255 | -1,07 | 0,527  | 0,745 | 94,748°  | 2,597  | 7,40E-02 | 0   |
| 61 | 11,25°   | 0,101 | -2,19 | 0,202  | 0,899 | 122,807° | 0,404  | 6,70E-01 | 15  |
| 61 | 327,009° | 0,292 | -0,89 | 0,61   | 0,708 | 89,938°  | 3,404  | 3,20E-02 | 20  |
| 62 | 98,285°  | 0,766 | 1,19  | 2,506  | 0,234 | 41,792°  | 23,496 | 1,13E-10 | 10  |
| 62 | 161,09°  | 0,811 | 1,46  | 3,004  | 0,189 | 37,071°  | 26,318 | 1,32E-11 | 0   |
| 62 | 167,61°  | 0,981 | 3,94  | 26,544 | 0,019 | 11,229°  | 38,493 | <1E-12   | 10  |
| 62 | 164,632° | 0,155 | -1,70 | 0,314  | 0,845 | 110,646° | 0,96   | 3,85E-01 | 20  |
| 62 | 219,229° | 0,342 | -0,65 | 0,729  | 0,658 | 83,901°  | 4,686  | 8,00E-03 | 30  |
| 62 | 232,034° | 0,203 | -1,37 | 0,414  | 0,797 | 102,374° | 1,643  | 1,94E-01 | 50  |
| 63 | 113,763° | 0,238 | -1,16 | 0,489  | 0,762 | 97,149°  | 2,257  | 1,04E-01 | 20  |
| 63 | 323,838° | 0,589 | 0,36  | 1,465  | 0,411 | 58,957°  | 13,875 | 2,90E-07 | 10  |
| 63 | 315,213° | 0,431 | -0,28 | 0,955  | 0,569 | 74,316°  | 7,437  | 4,44E-04 | 5   |
| 63 | 319,938° | 0,354 | -0,60 | 0,757  | 0,646 | 82,589°  | 5,008  | 6,00E-03 | 20  |

|     |          |       |       |       |       |          |        |          |    |
|-----|----------|-------|-------|-------|-------|----------|--------|----------|----|
| 63  | 30,177°  | 0,274 | -0,97 | 0,57  | 0,726 | 92,172°  | 3,007  | 4,80E-02 | 40 |
| 63  | 68,854°  | 0,187 | -1,47 | 0,38  | 0,813 | 104,978° | 1,394  | 2,50E-01 | 30 |
| 65  | 230,289° | 0,611 | 0,45  | 1,557 | 0,389 | 56,828°  | 14,956 | 8,87E-08 | 5  |
| 65  | 98,654°  | 0,84  | 1,66  | 3,455 | 0,16  | 33,832°  | 28,225 | 2,92E-12 | 20 |
| 65  | 82,715°  | 0,684 | 0,77  | 1,91  | 0,316 | 49,964°  | 18,698 | 3,46E-09 | 30 |
| 65  | 112,895° | 0,661 | 0,67  | 1,789 | 0,339 | 52,106°  | 17,494 | 8,57E-09 | 30 |
| 65  | 142,668° | 0,423 | -0,31 | 0,932 | 0,577 | 75,197°  | 7,145  | 6,12E-04 | 50 |
| 65  | 212,261° | 0,429 | -0,29 | 0,948 | 0,571 | 74,564°  | 7,354  | 4,87E-04 | 50 |
| 159 | 146,469° | 0,783 | 1,28  | 2,666 | 0,217 | 40,113°  | 24,502 | 5,34E-11 | 20 |
| 159 | 253,504° | 0,105 | -2,14 | 0,211 | 0,895 | 121,703° | 0,439  | 6,47E-01 | 40 |
| 159 | 233,848° | 0,565 | 0,26  | 1,374 | 0,435 | 61,21°   | 12,776 | 1,02E-06 | 80 |
| 159 | 160,721° | 0,564 | 0,26  | 1,369 | 0,436 | 61,339°  | 12,715 | 1,10E-06 | 80 |
| 159 | 161,611° | 0,269 | -1,00 | 0,558 | 0,731 | 92,859°  | 2,893  | 5,50E-02 | 80 |
| 159 | 113,376° | 0,352 | -0,61 | 0,752 | 0,648 | 82,787°  | 4,959  | 6,00E-03 | 65 |
| 160 | 46,694°  | 0,673 | 0,72  | 1,848 | 0,327 | 51,027°  | 18,097 | 5,38E-09 | 80 |
| 160 | 103,584° | 0,308 | -0,81 | 0,647 | 0,692 | 87,94°   | 3,793  | 2,20E-02 | 60 |
| 160 | 246,116° | 0,232 | -1,20 | 0,477 | 0,768 | 97,93°   | 2,154  | 1,16E-01 | 80 |
| 160 | 169,819° | 0,353 | -0,61 | 0,755 | 0,647 | 82,671°  | 4,988  | 6,00E-03 | 80 |
| 160 | 317,641° | 0,131 | -1,89 | 0,264 | 0,869 | 115,579° | 0,684  | 5,08E-01 | 80 |
| 160 | 30,16°   | 0,247 | -1,11 | 0,51  | 0,753 | 95,815°  | 2,441  | 8,60E-02 | 65 |
| 161 | 166,795° | 0,359 | -0,58 | 0,77  | 0,641 | 81,999°  | 5,159  | 5,00E-03 | 80 |
| 161 | 67,232°  | 0,519 | 0,08  | 1,211 | 0,481 | 65,578°  | 10,793 | 1,02E-05 | 60 |
| 161 | 224,586° | 0,124 | -1,96 | 0,249 | 0,876 | 117,155° | 0,611  | 5,46E-01 | 70 |
| 161 | 45,352°  | 0,152 | -1,72 | 0,307 | 0,848 | 111,302° | 0,919  | 4,02E-01 | 80 |
| 161 | 77,573°  | 0,4   | -0,41 | 0,872 | 0,6   | 77,588°  | 6,392  | 1,00E-03 | 80 |
| 161 | 331,595° | 0,232 | -1,20 | 0,477 | 0,768 | 97,92°   | 2,156  | 1,16E-01 | 65 |
| 162 | 342,203° | 0,639 | 0,57  | 1,682 | 0,361 | 54,182°  | 16,356 | 2,24E-08 | 70 |
| 162 | 49,964°  | 0,716 | 0,92  | 2,112 | 0,284 | 46,793°  | 20,53  | 9,52E-10 | 60 |
| 162 | 156,581° | 0,488 | -0,05 | 1,114 | 0,512 | 68,669°  | 9,511  | 4,42E-05 | 70 |
| 162 | 285,637° | 0,133 | -1,87 | 0,268 | 0,867 | 115,114° | 0,706  | 4,96E-01 | 70 |
| 162 | 348,726° | 0,417 | -0,34 | 0,917 | 0,583 | 75,767°  | 6,96   | 7,48E-04 | 60 |
| 163 | 94,687°  | 0,647 | 0,61  | 1,718 | 0,353 | 53,457°  | 16,75  | 1,58E-08 | 80 |
| 163 | 157,053° | 0,627 | 0,52  | 1,623 | 0,373 | 55,398°  | 15,706 | 4,14E-08 | 70 |
| 163 | 112,196° | 0,457 | -0,17 | 1,027 | 0,543 | 71,658°  | 8,37   | 1,59E-04 | 70 |
| 163 | 199,475° | 0,326 | -0,73 | 0,689 | 0,674 | 85,812°  | 4,245  | 1,30E-02 | 60 |
| 163 | 123,818° | 0,174 | -1,56 | 0,354 | 0,826 | 107,106° | 1,215  | 2,99E-01 | 60 |
| 163 | 91,644°  | 0,267 | -1,01 | 0,554 | 0,733 | 93,104°  | 2,853  | 5,70E-02 | 65 |
| 164 | 346,882° | 0,164 | -1,63 | 0,333 | 0,836 | 108,919° | 1,078  | 3,42E-01 | 90 |
| 164 | 19,271°  | 0,302 | -0,84 | 0,634 | 0,698 | 88,663°  | 3,648  | 2,50E-02 | 60 |
| 164 | 73,405°  | 0,106 | -2,13 | 0,213 | 0,894 | 121,354° | 0,451  | 6,40E-01 | 60 |
| 164 | 166,037° | 0,113 | -2,06 | 0,228 | 0,887 | 119,631° | 0,511  | 6,03E-01 | 60 |
| 164 | 136,879° | 0,213 | -1,31 | 0,436 | 0,787 | 100,772° | 1,814  | 1,63E-01 | 60 |
| 164 | 110,388° | 0,241 | -1,15 | 0,498 | 0,759 | 96,592°  | 2,332  | 9,70E-02 | 65 |
| 165 | 7,06°    | 0,627 | 0,52  | 1,624 | 0,373 | 55,367°  | 15,722 | 4,07E-08 | 70 |
| 165 | 138,342° | 0,413 | -0,35 | 0,906 | 0,587 | 76,205°  | 6,82   | 8,70E-04 | 80 |
| 165 | 99,372°  | 0,19  | -1,45 | 0,387 | 0,81  | 104,416° | 1,444  | 2,37E-01 | 60 |
| 165 | 142,907° | 0,268 | -1,00 | 0,555 | 0,732 | 93,036°  | 2,864  | 5,60E-02 | 60 |
| 165 | 143,371° | 0,454 | -0,18 | 1,018 | 0,546 | 71,991°  | 8,249  | 1,82E-04 | 60 |
| 165 | 259,972° | 0,117 | -2,02 | 0,236 | 0,883 | 118,695° | 0,547  | 5,81E-01 | 65 |
| 166 | 170,156° | 0,453 | -0,19 | 1,016 | 0,547 | 72,069°  | 8,221  | 1,87E-04 | 80 |
| 166 | 237,974° | 0,443 | -0,23 | 0,989 | 0,557 | 73,064°  | 7,867  | 2,77E-04 | 60 |
| 166 | 161,201° | 0,619 | 0,49  | 1,588 | 0,381 | 56,134°  | 15,318 | 6,10E-08 | 60 |
| 166 | 78,75°   | 0,553 | 0,21  | 1,329 | 0,447 | 62,397°  | 12,218 | 1,96E-06 | 60 |
| 166 | 91,911°  | 0,538 | 0,15  | 1,279 | 0,462 | 63,792°  | 11,58  | 4,11E-06 | 60 |
| 166 | 69,504°  | 0,393 | -0,43 | 0,855 | 0,607 | 78,272°  | 6,188  | 2,00E-03 | 65 |
| 167 | 118,329° | 0,481 | -0,08 | 1,095 | 0,519 | 69,324°  | 9,253  | 5,91E-05 | 70 |
| 167 | 350,858° | 0,196 | -1,41 | 0,4   | 0,804 | 103,456° | 1,535  | 2,16E-01 | 70 |
| 167 | 228,908° | 0,18  | -1,52 | 0,366 | 0,82  | 106,134° | 1,294  | 2,76E-01 | 60 |
| 167 | 38,522°  | 0,173 | -1,56 | 0,351 | 0,827 | 107,391° | 1,192  | 3,05E-01 | 60 |
| 167 | 134,526° | 0,33  | -0,71 | 0,699 | 0,67  | 85,311°  | 4,357  | 1,20E-02 | 60 |
| 167 | 125,532° | 0,182 | -1,50 | 0,37  | 0,818 | 105,767° | 1,325  | 2,67E-01 | 60 |
| 168 | 148,505° | 0,207 | -1,34 | 0,423 | 0,793 | 101,731° | 1,71   | 1,81E-01 | 60 |
| 168 | 307,796° | 0,098 | -2,22 | 0,196 | 0,902 | 123,56°  | 0,382  | 6,85E-01 | 70 |
| 168 | 262,951° | 0,324 | -0,74 | 0,685 | 0,676 | 86,016°  | 4,2    | 1,40E-02 | 70 |
| 168 | 339,672° | 0,13  | -1,90 | 0,262 | 0,87  | 115,772° | 0,674  | 5,12E-01 | 60 |
| 168 | 153,503° | 0,116 | -2,03 | 0,233 | 0,884 | 118,966° | 0,537  | 5,88E-01 | 45 |
| 168 | 21,903°  | 0,569 | 0,28  | 1,388 | 0,431 | 60,867°  | 12,94  | 8,47E-07 | 25 |
| 169 | 341,157° | 0,272 | -0,98 | 0,565 | 0,728 | 92,482°  | 2,955  | 5,10E-02 | 60 |
| 169 | 16,122°  | 0,337 | -0,68 | 0,717 | 0,663 | 84,461°  | 4,553  | 1,00E-02 | 50 |
| 169 | 288,261° | 0,297 | -0,86 | 0,623 | 0,703 | 89,234°  | 3,537  | 2,80E-02 | 70 |

|     |          |       |       |       |       |          |        |          |    |
|-----|----------|-------|-------|-------|-------|----------|--------|----------|----|
| 169 | 166,078° | 0,569 | 0,28  | 1,39  | 0,431 | 60,82°   | 12,963 | 8,25E-07 | 60 |
| 169 | 175,866° | 0,393 | -0,43 | 0,856 | 0,607 | 78,265°  | 6,19   | 2,00E-03 | 40 |
| 169 | 165,975° | 0,063 | -2,70 | 0,125 | 0,937 | 134,882° | 0,157  | 8,56E-01 | 20 |
| 170 | 134,588° | 0,405 | -0,38 | 0,885 | 0,595 | 77,038°  | 6,56   | 1,00E-03 | 60 |
| 170 | 65,738°  | 0,578 | 0,31  | 1,423 | 0,422 | 59,966°  | 13,377 | 5,12E-07 | 70 |
| 170 | 144,591° | 0,317 | -0,77 | 0,669 | 0,683 | 86,808°  | 4,028  | 1,70E-02 | 70 |
| 170 | 33,496°  | 0,151 | -1,73 | 0,306 | 0,849 | 111,405° | 0,912  | 4,04E-01 | 60 |
| 170 | 74,186°  | 0,24  | -1,15 | 0,494 | 0,76  | 96,836°  | 2,299  | 1,00E-01 | 40 |
| 170 | 348,75°  | 0,028 | -3,55 | 0,056 | 0,972 | 153,388° | 0,031  | 9,70E-01 | 20 |
| 171 | 11,389°  | 0,149 | -1,74 | 0,302 | 0,851 | 111,736° | 0,892  | 4,12E-01 | 70 |
| 171 | 334,634° | 0,16  | -1,66 | 0,324 | 0,84  | 109,724° | 1,022  | 3,62E-01 | 70 |
| 171 | 183,492° | 0,196 | -1,41 | 0,399 | 0,804 | 103,499° | 1,531  | 2,17E-01 | 70 |
| 171 | 123,854° | 0,17  | -1,59 | 0,345 | 0,83  | 107,874° | 1,155  | 3,17E-01 | 60 |
| 171 | 200,279° | 0,231 | -1,20 | 0,475 | 0,769 | 98,046°  | 2,14   | 1,17E-01 | 45 |
| 171 | 281,514° | 0,067 | -2,63 | 0,134 | 0,933 | 133,271° | 0,179  | 8,38E-01 | 20 |
| 172 | 338,461° | 0,082 | -2,42 | 0,165 | 0,918 | 128,13°  | 0,269  | 7,66E-01 | 60 |
| 172 | 149,918° | 0,104 | -2,15 | 0,209 | 0,896 | 121,916° | 0,432  | 6,52E-01 | 70 |
| 172 | 109,72°  | 0,065 | -2,67 | 0,131 | 0,935 | 133,792° | 0,171  | 8,44E-01 | 70 |
| 172 | 359,123° | 0,148 | -1,75 | 0,3   | 0,852 | 111,946° | 0,879  | 4,18E-01 | 80 |
| 172 | 334,076° | 0,187 | -1,47 | 0,381 | 0,813 | 104,887° | 1,402  | 2,47E-01 | 45 |
| 172 | 152,339° | 0,327 | -0,72 | 0,692 | 0,673 | 85,677°  | 4,275  | 1,30E-02 | 10 |
| 173 | 232,146° | 0,507 | 0,03  | 1,173 | 0,493 | 66,769°  | 10,287 | 1,83E-05 | 60 |
| 173 | 127,004° | 0,306 | -0,82 | 0,642 | 0,694 | 88,203°  | 3,74   | 2,30E-02 | 60 |
| 173 | 46,511°  | 0,163 | -1,64 | 0,331 | 0,837 | 109,098° | 1,065  | 3,47E-01 | 70 |
| 173 | 345,97°  | 0,127 | -1,93 | 0,256 | 0,873 | 116,425° | 0,644  | 5,28E-01 | 70 |
| 173 | 242,792° | 0,327 | -0,72 | 0,692 | 0,673 | 85,69°   | 4,272  | 1,30E-02 | 45 |
| 173 | 54,626°  | 0,046 | -3,03 | 0,093 | 0,954 | 142,063° | 0,086  | 9,19E-01 | 10 |
| 174 | 332,552° | 0,792 | 1,34  | 2,768 | 0,208 | 39,126°  | 25,092 | 3,41E-11 | 60 |
| 174 | 349,359° | 0,639 | 0,57  | 1,681 | 0,361 | 54,186°  | 16,354 | 2,25E-08 | 70 |
| 174 | 274,435° | 0,231 | -1,20 | 0,475 | 0,769 | 98,083°  | 2,135  | 1,18E-01 | 70 |
| 174 | 237,114° | 0,116 | -2,03 | 0,234 | 0,884 | 118,899° | 0,539  | 5,86E-01 | 70 |
| 174 | 18,542°  | 0,449 | -0,20 | 1,005 | 0,551 | 72,465°  | 8,079  | 2,19E-04 | 45 |
| 174 | 84,361°  | 0,097 | -2,23 | 0,195 | 0,903 | 123,786° | 0,376  | 6,89E-01 | 20 |

**Table S3.** Raw data time-shift sun compass group

| Fish # | Mean Vector( $\mu$ ) | corrected mean vector (15°/h) - in ° | corrected mean vector (actual) - in ° | Length of Mean Vector(r) | Concentration | Circular Variance | Circular Standard Deviation | Rayleigh Test(Z) | Rayleigh Test(p) | Cloudiness |
|--------|----------------------|--------------------------------------|---------------------------------------|--------------------------|---------------|-------------------|-----------------------------|------------------|------------------|------------|
| 66     | 311,685°             | 41,685°                              | 44,725°                               | 0,411                    | 0,901         | 0,589             | 76,406°                     | 6,757            | 9,32E-04         | 30         |
| 66     | 73,745°              | 163,745°                             | 176,979°                              | 0,418                    | 0,921         | 0,582             | 75,627°                     | 7,005            | 7,12E-04         | 10         |
| 66     | 65,859°              | 155,859°                             | 178,119°                              | 0,145                    | 0,293         | 0,855             | 112,629°                    | 0,839            | 4,35E-01         | 30         |
| 66     | 3,022°               | 93,022°                              | 121,109°                              | 0,628                    | 1,629         | 0,372             | 55,268°                     | 15,775           | 3,87E-08         | 10         |
| 66     | 338,66°              | 68,66°                               | 98,797°                               | 0,351                    | 0,749         | 0,649             | 82,94°                      | 4,92             | 7,00E-03         | 10         |
| 66     | 68,039°              | 158,039°                             | 186,071°                              | 0,191                    | 0,39          | 0,809             | 104,209°                    | 1,464            | 2,33E-01         | 10         |
| 67     | 41,535°              | 131,535°                             | 134,763°                              | 0,487                    | 1,113         | 0,513             | 68,705°                     | 9,497            | 4,49E-05         | 40         |
| 67     | 100,679°             | 190,679°                             | 204,102°                              | 0,25                     | 0,517         | 0,75              | 95,365°                     | 2,506            | 8,10E-02         | 10         |
| 67     | 3,38°                | 93,38°                               | 115,785°                              | 0,355                    | 0,759         | 0,645             | 82,461°                     | 5,041            | 6,00E-03         | 30         |
| 67     | 350,544°             | 80,544°                              | 108,707°                              | 0,174                    | 0,354         | 0,826             | 107,114°                    | 1,214            | 2,99E-01         | 10         |
| 67     | 141,831°             | 231,831°                             | 261,966°                              | 0,306                    | 0,644         | 0,694             | 88,129°                     | 3,755            | 2,20E-02         | 10         |
| 68     | 73,776°              | 163,776°                             | 167,191°                              | 0,644                    | 1,701         | 0,356             | 53,783°                     | 16,572           | 1,85E-08         | 40         |
| 68     | 28,078°              | 118,078°                             | 131,501°                              | 0,221                    | 0,453         | 0,779             | 99,599°                     | 1,949            | 1,43E-01         | 20         |
| 68     | 356,656°             | 86,656°                              | 109,061°                              | 0,454                    | 1,017         | 0,546             | 72,042°                     | 8,231            | 1,85E-04         | 25         |
| 68     | 35,062°              | 125,062°                             | 153,373°                              | 0,561                    | 1,36          | 0,439             | 61,583°                     | 12,599           | 1,26E-06         | 10         |
| 68     | 214,574°             | 304,574°                             | 334,706°                              | 0,061                    | 0,122         | 0,939             | 135,545°                    | 0,148            | 8,64E-01         | 20         |
| 68     | 198,794°             | 288,794°                             | 316,668°                              | 0,225                    | 0,462         | 0,775             | 98,972°                     | 2,024            | 1,32E-01         | 10         |
| 69     | 92,396°              | 182,396°                             | 186,°                                 | 0,241                    | 0,498         | 0,759             | 96,589°                     | 2,333            | 9,70E-02         | 40         |
| 69     | 52,13°               | 142,13°                              | 155,742°                              | 0,611                    | 1,553         | 0,389             | 56,915°                     | 14,912           | 9,30E-08         | 20         |
| 69     | 339,881°             | 69,881°                              | 92,429°                               | 0,183                    | 0,371         | 0,817             | 105,674°                    | 1,333            | 2,65E-01         | 25         |
| 69     | 205,463°             | 295,463°                             | 323,846°                              | 0,11                     | 0,221         | 0,89              | 120,411°                    | 0,483            | 6,20E-01         | 10         |
| 69     | 53,533°              | 143,533°                             | 173,665°                              | 0,366                    | 0,787         | 0,634             | 81,219°                     | 5,363            | 4,00E-03         | 20         |
| 69     | 45,26°               | 135,26°                              | 162,713°                              | 0,006                    | 0,012         | 0,994             | 182,664°                    | 0,002            | 9,98E-01         | 10         |
| 70     | 214,312°             | 304,312°                             | 307,916°                              | 0,684                    | 1,911         | 0,316             | 49,943°                     | 18,71            | 3,43E-09         | 40         |
| 70     | 261,099°             | 351,099°                             | 4,899°                                | 0,907                    | 5,661         | 0,093             | 25,323°                     | 32,902           | <1E-12           | 20         |
| 70     | 11,2°                | 101,2°                               | 124,031°                              | 0,355                    | 0,76          | 0,645             | 82,438°                     | 5,046            | 6,00E-03         | 30         |
| 70     | 320,173°             | 50,173°                              | 78,626°                               | 0,492                    | 1,128         | 0,508             | 68,2°                       | 9,699            | 3,57E-05         | 5          |

|    |          |          |          |       |        |       |          |        |          |    |
|----|----------|----------|----------|-------|--------|-------|----------|--------|----------|----|
| 70 | 230,43°  | 320,43°  | 350,557° | 0,178 | 0,363  | 0,822 | 106,371° | 1,274  | 2,81E-01 | 20 |
| 71 | 317,569° | 47,569°  | 51,361°  | 0,441 | 0,982  | 0,559 | 73,314°  | 7,78   | 3,05E-04 | 40 |
| 71 | 29,202°  | 119,202° | 133,376° | 0,797 | 2,826  | 0,203 | 38,595°  | 25,41  | 2,68E-11 | 20 |
| 71 | 318,475° | 48,475°  | 71,446°  | 0,38  | 0,823  | 0,62  | 79,66°   | 5,789  | 3,00E-03 | 30 |
| 71 | 359,12°  | 89,12°   | 117,71°  | 0,093 | 0,187  | 0,907 | 124,88°  | 0,346  | 7,10E-01 | 5  |
| 71 | 272,528° | 2,528°   | 32,641°  | 0,21  | 0,43   | 0,79  | 101,177° | 1,769  | 1,71E-01 | 20 |
| 72 | 40,69°   | 130,69°  | 134,672° | 0,242 | 0,499  | 0,758 | 96,537°  | 2,34   | 9,60E-02 | 40 |
| 72 | 283,458° | 13,458°  | 27,819°  | 0,051 | 0,103  | 0,949 | 139,585° | 0,106  | 9,01E-01 | 20 |
| 72 | 120,753° | 210,753° | 233,862° | 0,2   | 0,408  | 0,8   | 102,802° | 1,599  | 2,03E-01 | 30 |
| 72 | 337,653° | 67,653°  | 96,309°  | 0,108 | 0,218  | 0,892 | 120,76°  | 0,471  | 6,27E-01 | 5  |
| 72 | 42,771°  | 132,771° | 162,875° | 0,266 | 0,552  | 0,734 | 93,211°  | 2,836  | 5,80E-02 | 20 |
| 73 | 26,241°  | 116,241° | 120,412° | 0,88  | 4,457  | 0,12  | 29,007°  | 30,956 | <1E-12   | 40 |
| 73 | 53,087°  | 143,087° | 157,634° | 0,786 | 2,698  | 0,214 | 39,804°  | 24,686 | 4,65E-11 | 20 |
| 73 | 47,608°  | 137,608° | 160,855° | 0,553 | 1,329  | 0,447 | 62,403°  | 12,215 | 1,97E-06 | 30 |
| 73 | 5,476°   | 95,476°  | 124,26°  | 0,155 | 0,314  | 0,845 | 110,619° | 0,962  | 3,84E-01 | 5  |
| 73 | 307,583° | 37,583°  | 67,664°  | 0,174 | 0,353  | 0,826 | 107,215° | 1,206  | 3,01E-01 | 20 |
| 74 | 174,801° | 264,801° | 269,162° | 0,221 | 0,454  | 0,779 | 99,491°  | 1,961  | 1,41E-01 | 40 |
| 74 | 241,775° | 331,775° | 346,507° | 0,959 | 12,494 | 0,041 | 16,556°  | 36,796 | <1E-12   | 30 |
| 74 | 347,63°  | 77,63°   | 101,148° | 0,432 | 0,958  | 0,568 | 74,219°  | 7,47   | 4,29E-04 | 30 |
| 74 | 105,336° | 195,336° | 224,182° | 0,025 | 0,05   | 0,975 | 155,493° | 0,025  | 9,75E-01 | 5  |
| 74 | 273,35°  | 3,35°    | 33,417°  | 0,038 | 0,077  | 0,962 | 146,288° | 0,059  | 9,43E-01 | 30 |
| 74 | 270,144° | ,144°    | 26,852°  | 0,062 | 0,125  | 0,938 | 134,995° | 0,155  | 8,58E-01 | 10 |
| 75 | 51,671°  | 141,671° | 146,223° | 0,636 | 1,664  | 0,364 | 54,545°  | 16,161 | 2,68E-08 | 50 |
| 75 | 130,964° | 220,964° | 236,065° | 0,889 | 4,813  | 0,111 | 27,753°  | 31,635 | <1E-12   | 40 |
| 75 | 136,077° | 226,077° | 249,861° | 0,94  | 8,626  | 0,06  | 20,132°  | 35,354 | <1E-12   | 15 |
| 75 | 153,658° | 243,658° | 272,564° | 0,269 | 0,558  | 0,731 | 92,857°  | 2,893  | 5,40E-02 | 5  |
| 75 | 61,257°  | 151,257° | 181,293° | 0,084 | 0,168  | 0,916 | 127,667° | 0,279  | 7,59E-01 | 30 |
| 75 | 146,25°  | 236,25°  | 262,758° | 0,057 | 0,114  | 0,943 | 137,273° | 0,129  | 8,81E-01 | 0  |
| 76 | 90,246°  | 180,246° | 188,271° | 0,759 | 2,442  | 0,241 | 42,523°  | 23,059 | 1,56E-10 | 50 |
| 76 | 311,036° | 41,036°  | 58,993°  | 0,226 | 0,464  | 0,774 | 98,825°  | 2,042  | 1,30E-01 | 40 |
| 76 | 314,224° | 44,224°  | 69,73°   | 0,764 | 2,488  | 0,236 | 41,995°  | 23,375 | 1,24E-10 | 5  |
| 76 | 52,354°  | 142,354° | 171,994° | 0,234 | 0,482  | 0,766 | 97,63°   | 2,193  | 1,11E-01 | 5  |
| 76 | 124,975° | 214,975° | 244,588° | 0,041 | 0,082  | 0,959 | 144,842° | 0,067  | 9,36E-01 | 30 |
| 77 | 195,828° | 285,828° | 294,048° | 0,27  | 0,561  | 0,73  | 92,691°  | 2,92   | 5,30E-02 | 40 |
| 77 | 82,98°   | 172,98°  | 191,109° | 0,42  | 0,924  | 0,58  | 75,52°   | 7,04   | 6,86E-04 | 30 |
| 77 | 172,547° | 262,547° | 288,278° | 0,827 | 3,243  | 0,173 | 35,261°  | 27,389 | 5,69E-12 | 5  |
| 77 | 180,314° | 270,314° | 299,991° | 0,17  | 0,344  | 0,83  | 107,926° | 1,151  | 3,18E-01 | 5  |
| 78 | ,97°     | 90,97°   | 99,384°  | 0,391 | 0,849  | 0,609 | 78,548°  | 6,107  | 2,00E-03 | 40 |
| 78 | 38,68°   | 128,68°  | 146,98°  | 0,279 | 0,581  | 0,721 | 91,537°  | 3,116  | 4,30E-02 | 40 |
| 78 | 121,364° | 211,364° | 237,315° | 0,458 | 1,029  | 0,542 | 71,591°  | 8,395  | 1,54E-04 | 5  |
| 78 | 140,16°  | 230,16°  | 259,873° | 0,313 | 0,66   | 0,687 | 87,298°  | 3,925  | 1,90E-02 | 5  |
| 78 | 189,068° | 279,068° | 308,557° | 0,258 | 0,534  | 0,742 | 94,306°  | 2,664  | 6,90E-02 | 30 |
| 79 | 25,639°  | 115,639° | 124,248° | 0,873 | 4,255  | 0,127 | 29,802°  | 30,519 | <1E-12   | 40 |
| 79 | 155,896° | 245,896° | 264,196° | 0,346 | 0,737  | 0,654 | 83,517°  | 4,779  | 3,00E-03 | 30 |
| 79 | 181,493° | 271,493° | 297,552° | 0,158 | 0,319  | 0,842 | 110,155° | 0,993  | 3,73E-01 | 5  |
| 79 | 90,477°  | 180,477° | 210,224° | 0,131 | 0,263  | 0,869 | 115,612° | 0,682  | 5,08E-01 | 5  |
| 79 | 99,883°  | 189,883° | 219,187° | 0,261 | 0,541  | 0,739 | 93,896°  | 2,727  | 6,50E-02 | 20 |
| 79 | 109,769° | 199,769° | 224,604° | 0,039 | 0,077  | 0,961 | 146,193° | 0,06   | 9,43E-01 | 0  |
| 80 | 56,387°  | 146,387° | 155,19°  | 0,419 | 0,921  | 0,581 | 75,607°  | 7,012  | 7,07E-04 | 40 |
| 80 | 296,716° | 26,716°  | 45,186°  | 0,678 | 1,879  | 0,322 | 50,496°  | 18,396 | 4,31E-09 | 30 |
| 80 | 34,219°  | 124,219° | 150,385° | 0,795 | 2,807  | 0,205 | 38,766°  | 25,308 | 2,89E-11 | 10 |
| 80 | 67,848°  | 157,848° | 187,628° | 0,056 | 0,113  | 0,944 | 137,478° | 0,126  | 8,83E-01 | 5  |
| 81 | 302,156° | 32,156°  | 41,154°  | 0,9   | 5,298  | 0,1   | 26,281°  | 32,411 | <1E-12   | 40 |
| 81 | 242,416° | 332,416° | 351,055° | 0,238 | 0,49   | 0,762 | 97,072°  | 1,53   | 2,18E-01 | 20 |
| 82 | 10,335°  | 100,335° | 109,527° | 0,399 | 0,87   | 0,601 | 77,66°   | 6,371  | 1,00E-03 | 40 |
| 82 | 46,198°  | 136,198° | 155,173° | 0,64  | 1,683  | 0,36  | 54,153°  | 16,372 | 2,21E-08 | 20 |
| 82 | 38,71°   | 128,71°  | 155,187° | 0,648 | 1,72   | 0,352 | 53,415°  | 16,773 | 1,55E-08 | 5  |
| 82 | 7,316°   | 97,316°  | 127,187° | 0,105 | 0,211  | 0,895 | 121,641° | 0,441  | 6,46E-01 | 5  |
| 83 | 266,165° | 356,165° | 5,551°   | 0,452 | 1,012  | 0,548 | 72,199°  | 8,174  | 1,97E-04 | 30 |
| 83 | 306,108° | 36,108°  | 55,25°   | 0,779 | 2,624  | 0,221 | 40,543°  | 24,244 | 6,49E-11 | 20 |
| 83 | 315,994° | 45,994°  | 72,672°  | 0,607 | 1,54   | 0,393 | 57,214°  | 14,757 | 1,10E-07 | 5  |
| 83 | 309,918° | 39,918°  | 69,842°  | 0,645 | 1,71   | 0,355 | 53,61°   | 16,666 | 1,70E-08 | 5  |
| 83 | 130,002° | 220,002° | 248,985° | 0,251 | 0,518  | 0,749 | 95,332°  | 2,51   | 8,10E-02 | 20 |
| 84 | 18,73°   | 108,73°  | 118,311° | 0,671 | 1,841  | 0,329 | 51,162°  | 18,021 | 5,70E-09 | 30 |
| 84 | 218,484° | 308,484° | 327,791° | 0,422 | 0,931  | 0,578 | 75,239°  | 7,131  | 6,21E-04 | 20 |
| 84 | 149,417° | 239,417° | 266,194° | 0,231 | 0,474  | 0,769 | 98,127°  | 2,129  | 1,19E-01 | 5  |
| 85 | 4,948°   | 94,948°  | 104,917° | 0,576 | 1,415  | 0,424 | 60,185°  | 13,27  | 5,79E-07 | 30 |
| 85 | 324,631° | 54,631°  | 74,267°  | 0,579 | 1,425  | 0,421 | 59,939°  | 13,39  | 5,04E-07 | 15 |
| 85 | 303,984° | 33,984°  | 60,858°  | 0,774 | 2,58   | 0,226 | 41,001°  | 23,97  | 7,97E-11 | 5  |
| 85 | 281,905° | 11,905°  | 41,897°  | 0,462 | 1,04   | 0,538 | 71,223°  | 8,53   | 1,33E-04 | 5  |



|     |          |          |          |       |        |       |          |        |          |    |
|-----|----------|----------|----------|-------|--------|-------|----------|--------|----------|----|
| 85  | 123,8°   | 213,8°   | 242,603° | 0,353 | 0,754  | 0,647 | 82,72°   | 4,975  | 6,00E-03 | 20 |
| 85  | 199,201° | 289,201° | 312,624° | 0,109 | 0,219  | 0,891 | 120,628° | 0,475  | 6,24E-01 | 5  |
| 86  | 20,561°  | 110,561° | 140,403° | 0,425 | 0,939  | 0,575 | 74,94°   | 7,229  | 5,58E-04 | 5  |
| 86  | 92,733°  | 182,733° | 211,883° | 0,376 | 0,812  | 0,624 | 80,108°  | 5,664  | 3,00E-03 | 20 |
| 86  | 214,322° | 304,322° | 328,911° | 0,131 | 0,265  | 0,869 | 115,452° | 0,69   | 5,05E-01 | 5  |
| 86  | 4,921°   | 94,921°  | 115,563° | 0,328 | 0,695  | 0,672 | 85,548°  | 4,304  | 1,30E-02 | 10 |
| 86  | 198,31°  | 288,31°  | 304,375° | 0,043 | 0,086  | 0,957 | 143,76°  | 0,074  | 9,30E-01 | 15 |
| 86  | 164,789° | 254,789° | 265,585° | 0,536 | 1,272  | 0,464 | 63,975°  | 11,498 | 4,52E-06 | 15 |
| 88  | 120,811° | 210,811° | 214,508° | 0,405 | 0,886  | 0,595 | 77,022°  | 6,565  | 1,00E-03 | 20 |
| 88  | 29,535°  | 119,535° | 133,309° | 0,705 | 2,038  | 0,295 | 47,893°  | 19,889 | 1,49E-09 | 5  |
| 88  | 21,807°  | 111,807° | 134,595° | 0,671 | 1,838  | 0,329 | 51,218°  | 17,989 | 5,84E-09 | 0  |
| 88  | 178,55°  | 268,55°  | 296,686° | 0,623 | 1,608  | 0,377 | 55,715°  | 15,538 | 4,88E-08 | 30 |
| 88  | 338,103° | 68,103°  | 97,769°  | 0,121 | 0,243  | 0,879 | 117,794° | 0,584  | 5,61E-01 | 50 |
| 88  | 206,358° | 296,358° | 323,23°  | 0,078 | 0,157  | 0,922 | 129,35°  | 0,245  | 7,85E-01 | 40 |
| 90  | 357,81°  | 87,81°   | 91,695°  | 0,607 | 1,54   | 0,393 | 57,206°  | 14,761 | 1,09E-07 | 20 |
| 90  | 32,06°   | 122,06°  | 136,203° | 0,301 | 0,631  | 0,699 | 88,779°  | 3,625  | 2,60E-02 | 10 |
| 90  | 90,92°   | 180,92°  | 203,843° | 0,123 | 0,249  | 0,877 | 117,194° | 0,61   | 5,46E-01 | 5  |
| 90  | 190,259° | 280,259° | 308,653° | 0,327 | 0,693  | 0,673 | 85,632°  | 4,285  | 1,30E-02 | 0  |
| 90  | 201,155° | 291,155° | 320,792° | 0,391 | 0,85   | 0,609 | 78,486°  | 6,125  | 2,00E-03 | 40 |
| 90  | 42,014°  | 132,014° | 158,703° | 0,18  | 0,367  | 0,82  | 106,043° | 1,301  | 2,74E-01 | 40 |
| 91  | 28,104°  | 118,104° | 122,176° | 0,888 | 4,742  | 0,112 | 27,989°  | 31,508 | <1E-12   | 20 |
| 91  | 170,357° | 260,357° | 274,684° | 0,377 | 0,813  | 0,623 | 80,076°  | 5,673  | 3,00E-03 | 10 |
| 91  | 65,671°  | 155,671° | 178,729° | 0,291 | 0,609  | 0,709 | 89,967°  | 3,398  | 3,20E-02 | 0  |
| 91  | 28,987°  | 118,987° | 147,502° | 0,552 | 1,326  | 0,448 | 62,48°   | 12,179 | 2,05E-06 | 5  |
| 91  | 336,095° | 66,095°  | 95,697°  | 0,773 | 2,566  | 0,227 | 41,147°  | 23,882 | 8,51E-11 | 30 |
| 91  | 263,649° | 353,649° | 20,245°  | 0,212 | 0,434  | 0,788 | 100,934° | 1,796  | 1,66E-01 | 40 |
| 92  | 56,25°   | 146,25°  | 150,322° | 0,966 | 14,906 | 0,034 | 15,103°  | 37,315 | <1E-12   | 20 |
| 92  | 87,235°  | 177,235° | 191,928° | 0,992 | 60,057 | 0,008 | 7,425°   | 39,334 | <1E-12   | 10 |
| 92  | 83,591°  | 173,591° | 196,914° | 0,775 | 2,592  | 0,225 | 40,876°  | 24,045 | 7,53E-11 | 0  |
| 92  | 131,362° | 221,362° | 249,935° | 0,281 | 0,586  | 0,719 | 91,288°  | 3,159  | 4,10E-02 | 5  |
| 92  | 7,209°   | 97,209°  | 126,792° | 0,484 | 1,103  | 0,516 | 69,027°  | 9,37   | 5,18E-05 | 30 |
| 93  | 290,225° | 20,225°  | 24,485°  | 0,262 | 0,542  | 0,738 | 93,811°  | 2,74   | 6,40E-02 | 20 |
| 93  | 43,045°  | 133,045° | 147,92°  | 0,187 | 0,382  | 0,813 | 104,85°  | 1,405  | 2,47E-01 | 10 |
| 93  | 120,21°  | 210,21°  | 233,794° | 0,437 | 0,97   | 0,563 | 73,751°  | 7,629  | 3,60E-04 | 10 |
| 93  | 241,631° | 331,631° | ,316°    | 0,068 | 0,137  | 0,932 | 132,703° | 0,187  | 8,31E-01 | 5  |
| 93  | 294,705° | 24,705°  | 54,244°  | 0,142 | 0,287  | 0,858 | 113,245° | 0,804  | 4,50E-01 | 25 |
| 93  | 11,735°  | 101,735° | 128,043° | 0,088 | 0,176  | 0,912 | 126,414° | 0,308  | 7,38E-01 | 60 |
| 94  | 59,423°  | 149,423° | 153,871° | 0,135 | 0,272  | 0,865 | 114,69°  | 0,728  | 4,86E-01 | 20 |
| 94  | 68,239°  | 158,239° | 173,295° | 0,162 | 0,328  | 0,838 | 109,341° | 1,048  | 3,53E-01 | 10 |
| 94  | 280,009° | 10,009°  | 33,722°  | 0,887 | 4,713  | 0,113 | 28,088°  | 31,455 | <1E-12   | 10 |
| 94  | 322,049° | 52,049°  | 80,788°  | 0,532 | 1,258  | 0,468 | 64,366°  | 11,323 | 5,54E-06 | 5  |
| 94  | 353,986° | 83,986°  | 113,502° | 0,202 | 0,413  | 0,798 | 102,433° | 1,637  | 1,95E-01 | 25 |
| 94  | 161,166° | 251,166° | 277,275° | 0,252 | 0,521  | 0,748 | 95,124°  | 2,541  | 7,80E-02 | 60 |
| 96  | 81,588°  | 171,588° | 195,679° | 0,329 | 0,697  | 0,671 | 85,437°  | 4,329  | 1,20E-02 | 10 |
| 96  | 253,884° | 343,884° | 12,777°  | 0,135 | 0,272  | 0,865 | 114,708° | 0,727  | 4,86E-01 | 10 |
| 96  | 25,121°  | 115,121° | 144,527° | 0,432 | 0,956  | 0,568 | 74,281°  | 7,449  | 4,39E-04 | 20 |
| 96  | 37,089°  | 127,089° | 152,994° | 0,365 | 0,784  | 0,635 | 81,345°  | 5,329  | 4,00E-03 | 40 |
| 98  | 127,776° | 217,776° | 226,619° | 0,568 | 1,384  | 0,432 | 60,975°  | 12,888 | 8,99E-07 | 20 |
| 98  | 126,767° | 216,767° | 235,304° | 0,294 | 0,615  | 0,706 | 89,645°  | 3,459  | 3,00E-02 | 15 |
| 98  | 218,98°  | 308,98°  | 334,892° | 0,507 | 1,174  | 0,493 | 66,738°  | 10,3   | 1,80E-05 | 0  |
| 98  | 153,684° | 243,684° | 273,201° | 0,199 | 0,407  | 0,801 | 102,895° | 1,59   | 2,05E-01 | 90 |
| 98  | 226,507° | 316,507° | 345,295° | 0,293 | 0,612  | 0,707 | 89,811°  | 3,428  | 3,10E-02 | 30 |
| 98  | 334,349° | 64,349°  | 88,431°  | 0,226 | 0,465  | 0,774 | 98,762°  | 2,05   | 1,29E-01 | 60 |
| 100 | 85,497°  | 175,497° | 184,725° | 0,142 | 0,286  | 0,858 | 113,259° | 0,804  | 4,50E-01 | 20 |
| 100 | 114,316° | 204,316° | 223,018° | 0,171 | 0,347  | 0,829 | 107,686° | 1,169  | 3,12E-01 | 10 |
| 100 | 344,733° | 74,733°  | 101,048° | 0,282 | 0,589  | 0,718 | 91,129°  | 3,187  | 4,00E-02 | 20 |
| 100 | 27,956°  | 117,956° | 147,497° | 0,449 | 1,003  | 0,551 | 72,525°  | 8,058  | 2,25E-04 | 70 |
| 100 | ,325°    | 90,325°  | 119,007° | 0,317 | 0,67   | 0,683 | 86,797°  | 4,031  | 1,70E-02 | 30 |
| 100 | 22,°     | 112,°    | 135,831° | 0,262 | 0,542  | 0,738 | 93,832°  | 2,737  | 6,40E-02 | 65 |
| 103 | 47,16°   | 137,16°  | 146,963° | 0,809 | 2,978  | 0,191 | 37,285°  | 26,191 | 1,46E-11 | 40 |
| 103 | 139,559° | 229,559° | 248,914° | 0,405 | 0,886  | 0,595 | 76,998°  | 6,573  | 1,00E-03 | 20 |
| 103 | 152,388° | 242,388° | 269,083° | 0,479 | 1,09   | 0,521 | 69,48°   | 9,192  | 6,33E-05 | 10 |
| 103 | 107,852° | 197,852° | 227,474° | 0,533 | 1,262  | 0,467 | 64,265°  | 11,368 | 5,26E-06 | 70 |
| 103 | 55,553°  | 145,553° | 173,943° | 0,108 | 0,217  | 0,892 | 120,941° | 0,465  | 6,31E-01 | 25 |
| 103 | 82,634°  | 172,634° | 195,948° | 0,183 | 0,372  | 0,817 | 105,626° | 1,337  | 2,64E-01 | 70 |
| 104 | 225,948° | 315,948° | 326,135° | 0,288 | 0,602  | 0,712 | 90,361°  | 3,326  | 3,50E-02 | 40 |
| 104 | 175,719° | 265,719° | 285,235° | 0,894 | 5,021  | 0,106 | 27,092°  | 31,986 | <1E-12   | 20 |
| 104 | 96,697°  | 186,697° | 213,575° | 0,719 | 2,132  | 0,281 | 46,501°  | 20,701 | 8,44E-10 | 10 |
| 104 | 237,226° | 327,226° | 356,879° | 0,395 | 0,859  | 0,605 | 78,141°  | 6,227  | 2,00E-03 | 60 |
| 104 | 328,074° | 58,074°  | 86,402°  | 0,603 | 1,523  | 0,397 | 57,597°  | 14,561 | 1,36E-07 | 25 |

|     |          |          |          |       |       |       |          |        |          |    |
|-----|----------|----------|----------|-------|-------|-------|----------|--------|----------|----|
| 104 | 38,799°  | 128,799° | 151,847° | 0,233 | 0,48  | 0,767 | 97,775°  | 2,174  | 1,13E-01 | 70 |
| 106 | 245,947° | 335,947° | 346,707° | 0,716 | 2,107 | 0,284 | 46,866°  | 20,488 | 9,81E-10 | 20 |
| 106 | 219,535° | 309,535° | 329,051° | 0,705 | 2,04  | 0,295 | 47,877°  | 19,898 | 1,48E-09 | 15 |
| 106 | 295,759° | 25,759°  | 52,813°  | 0,146 | 0,295 | 0,854 | 112,416° | 0,852  | 4,29E-01 | 10 |
| 106 | 272,932° | 2,932°   | 32,622°  | 0,333 | 0,705 | 0,667 | 85,025°  | 4,423  | 1,10E-02 | 50 |
| 106 | 10,514°  | 100,514° | 128,645° | 0,126 | 0,254 | 0,874 | 116,621° | 0,635  | 5,33E-01 | 25 |
| 118 | 34,743°  | 124,743° | 129,457° | 0,652 | 1,742 | 0,348 | 52,982°  | 17,01  | 1,27E-08 | 0  |
| 118 | 105,63°  | 195,63°  | 209,338° | 0,151 | 0,305 | 0,849 | 111,478° | 0,908  | 4,06E-01 | 20 |
| 118 | 341,09°  | 71,09°   | 91,713°  | 0,139 | 0,281 | 0,861 | 113,818° | 0,773  | 4,64E-01 | 20 |
| 118 | 33,504°  | 123,504° | 148,01°  | 0,089 | 0,178 | 0,911 | 126,157° | 0,314  | 7,33E-01 | 0  |
| 118 | 238,446° | 328,446° | 353,121° | 0,305 | 0,641 | 0,695 | 88,277°  | 3,725  | 2,30E-02 | 0  |
| 118 | 280,365° | 10,365°  | 31,07°   | 0,218 | 0,447 | 0,782 | 99,988°  | 1,903  | 1,49E-01 | 0  |
| 119 | 175,134° | 265,134° | 270,016° | 0,115 | 0,231 | 0,885 | 119,254° | 0,526  | 5,94E-01 | 0  |
| 119 | 269,411° | 359,411° | 13,271°  | 0,061 | 0,123 | 0,939 | 135,324° | 0,151  | 8,61E-01 | 20 |
| 119 | 224,614° | 314,614° | 335,341° | 0,271 | 0,563 | 0,729 | 92,572°  | 2,94   | 5,20E-02 | 20 |
| 119 | 54,464°  | 144,464° | 169,008° | 0,209 | 0,428 | 0,791 | 101,364° | 1,749  | 1,74E-01 | 0  |
| 119 | 162,709° | 252,709° | 277,351° | 0,204 | 0,416 | 0,796 | 102,192° | 1,661  | 1,91E-01 | 0  |
| 119 | 325,426° | 55,426°  | 76,131°  | 0,086 | 0,173 | 0,914 | 126,874° | 0,297  | 7,46E-01 | 0  |
| 120 | 53,085°  | 143,085° | 147,967° | 0,888 | 4,773 | 0,112 | 27,886°  | 31,563 | <1E-12   | 0  |
| 120 | 54,46°   | 144,46°  | 158,32°  | 0,822 | 3,152 | 0,178 | 35,923°  | 26,998 | 7,76E-12 | 20 |
| 120 | 57,988°  | 147,988° | 168,817° | 0,871 | 4,178 | 0,129 | 30,125°  | 30,339 | <1E-12   | 0  |
| 120 | 19,317°  | 109,317° | 133,897° | 0,221 | 0,454 | 0,779 | 99,49°   | 1,962  | 1,41E-01 | 0  |
| 120 | 40,158°  | 130,158° | 154,766° | 0,209 | 0,428 | 0,791 | 101,313° | 1,755  | 1,73E-01 | 0  |
| 120 | 331,04°  | 61,04°   | 81,536°  | 0,232 | 0,477 | 0,768 | 97,926°  | 2,155  | 1,16E-01 | 0  |
| 121 | 64,131°  | 154,131° | 159,18°  | 0,579 | 1,428 | 0,421 | 59,863°  | 13,427 | 4,83E-07 | 0  |
| 121 | 235,035° | 325,035° | 345,966° | 0,442 | 0,985 | 0,558 | 73,192°  | 7,823  | 2,91E-04 | 0  |
| 121 | 91,829°  | 181,829° | 202,76°  | 0,892 | 4,932 | 0,108 | 27,368°  | 31,84  | <1E-12   | 20 |
| 121 | 70,254°  | 160,254° | 184,869° | 0,834 | 3,346 | 0,166 | 34,55°   | 27,806 | 4,08E-12 | 0  |
| 121 | 91,35°   | 181,35°  | 205,923° | 0,866 | 4,039 | 0,134 | 30,731°  | 30     | <1E-12   | 0  |
| 121 | 111,479° | 201,479° | 221,869° | 0,854 | 3,732 | 0,146 | 32,218°  | 29,157 | <1E-1237 | 0  |
| 122 | 33,391°  | 123,391° | 128,608° | 0,275 | 0,571 | 0,725 | 92,105°  | 3,018  | 4,80E-02 | 0  |
| 122 | 193,131° | 283,131° | 297,294° | 0,225 | 0,462 | 0,775 | 98,93°   | 2,029  | 1,31E-01 | 20 |
| 122 | 354,13°  | 84,13°   | 105,161° | 0,47  | 1,063 | 0,53  | 70,411°  | 8,835  | 9,46E-05 | 20 |
| 122 | 100,59°  | 190,59°  | 215,239° | 0,344 | 0,733 | 0,656 | 83,672°  | 4,741  | 8,00E-03 | 0  |
| 122 | 232,469° | 322,469° | 347,042° | 0,106 | 0,214 | 0,894 | 121,294° | 0,453  | 6,39E-01 | 0  |
| 122 | 271,225° | 1,225°   | 21,615°  | 0,142 | 0,287 | 0,858 | 113,243° | 0,804  | 4,50E-01 | 0  |
| 124 | 29,581°  | 119,581° | 124,965° | 0,623 | 1,608 | 0,377 | 55,703°  | 15,544 | 4,85E-08 | 0  |
| 124 | 248,088° | 338,088° | 352,401° | 0,327 | 0,693 | 0,673 | 85,638°  | 4,284  | 1,30E-02 | 10 |
| 124 | 8,455°   | 98,455°  | 119,486° | 0,095 | 0,19  | 0,905 | 124,448° | 0,357  | 7,02E-01 | 20 |
| 124 | 165,233° | 255,233° | 279,882° | 0,209 | 0,428 | 0,791 | 101,319° | 1,754  | 1,74E-01 | 0  |
| 124 | 38,068°  | 128,068° | 152,604° | 0,351 | 0,749 | 0,649 | 82,937°  | 4,921  | 7,00E-03 | 0  |
| 124 | 306,735° | 36,735°  | 57,018°  | 0,808 | 2,964 | 0,192 | 37,403°  | 26,121 | 1,54E-11 | 0  |
| 125 | 118,028° | 208,028° | 213,58°  | 0,431 | 0,956 | 0,569 | 74,29°   | 7,446  | 4,40E-04 | 0  |
| 125 | 104,668° | 194,668° | 208,981° | 0,416 | 0,914 | 0,584 | 75,91°   | 6,914  | 7,86E-04 | 10 |
| 125 | 196,495° | 286,495° | 307,625° | 0,33  | 0,7   | 0,67  | 85,271°  | 4,366  | 1,20E-02 | 20 |
| 125 | 74,624°  | 164,624° | 189,305° | 0,282 | 0,589 | 0,718 | 91,124°  | 3,188  | 4,00E-02 | 0  |
| 125 | 58,771°  | 148,771° | 173,307° | 0,287 | 0,599 | 0,713 | 90,572°  | 3,287  | 3,60E-02 | 0  |
| 125 | 163,151° | 253,151° | 273,325° | 0,198 | 0,404 | 0,802 | 103,087° | 1,571  | 2,09E-01 | 0  |
| 126 | 199,504° | 289,504° | 298,734° | 0,835 | 3,368 | 0,165 | 34,402°  | 27,893 | 3,81E-12 | 0  |
| 126 | 233,351° | 323,351° | 340,642° | 0,59  | 1,468 | 0,41  | 58,884°  | 13,911 | 2,79E-07 | 10 |
| 126 | 173,996° | 263,996° | 286,861° | 0,088 | 0,177 | 0,912 | 126,264° | 0,311  | 7,35E-01 | 20 |
| 126 | 188,732° | 278,732° | 303,782° | 0,449 | 1,005 | 0,551 | 72,458°  | 8,082  | 2,19E-04 | 0  |
| 126 | 105,336° | 195,336° | 218,545° | 0,21  | 0,429 | 0,79  | 101,297° | 1,756  | 1,73E-01 | 0  |
| 126 | 241,508° | 331,508° | 349,424° | 0,174 | 0,354 | 0,826 | 107,082° | 1,216  | 2,98E-01 | 0  |
| 127 | 82,769°  | 172,769° | 182,164° | 0,276 | 0,574 | 0,724 | 91,953°  | 3,044  | 4,70E-02 | 0  |
| 127 | 113,979° | 203,979° | 221,402° | 0,174 | 0,353 | 0,826 | 107,152° | 1,211  | 3,00E-01 | 10 |
| 127 | 351,565° | 81,565°  | 104,577° | 0,228 | 0,468 | 0,772 | 98,516°  | 2,08   | 1,25E-01 | 10 |
| 127 | 4,396°   | 94,396°  | 119,457° | 0,243 | 0,502 | 0,757 | 96,333°  | 2,368  | 9,30E-02 | 0  |
| 127 | 199,648° | 289,648° | 312,788° | 0,218 | 0,446 | 0,782 | 100,027° | 1,898  | 1,50E-01 | 0  |
| 127 | 74,885°  | 164,885° | 182,672° | 0,099 | 0,199 | 0,901 | 123,266° | 0,391  | 6,79E-01 | 0  |
| 128 | 74,269°  | 164,269° | 173,664° | 0,236 | 0,486 | 0,764 | 97,329°  | 2,233  | 1,07E-01 | 0  |
| 128 | 41,298°  | 131,298° | 148,721° | 0,264 | 0,547 | 0,736 | 93,511°  | 2,788  | 6,10E-02 | 10 |
| 128 | 24,271°  | 114,271° | 137,283° | 0,393 | 0,854 | 0,607 | 78,329°  | 6,171  | 2,00E-03 | 10 |
| 128 | 195,416° | 285,416° | 310,477° | 0,454 | 1,017 | 0,546 | 72,04°   | 8,232  | 1,85E-04 | 0  |
| 128 | 305,076° | 35,076°  | 58,216°  | 0,596 | 1,494 | 0,404 | 58,262°  | 14,223 | 1,97E-07 | 0  |
| 128 | 39,412°  | 129,412° | 147,069° | 0,311 | 0,653 | 0,689 | 87,629°  | 3,857  | 2,00E-02 | 0  |
| 129 | 11,796°  | 101,796° | 111,357° | 0,384 | 0,832 | 0,616 | 79,255°  | 5,903  | 2,00E-03 | 0  |
| 129 | 149,65°  | 239,65°  | 257,335° | 0,184 | 0,375 | 0,816 | 105,356° | 1,36   | 2,58E-01 | 10 |
| 129 | 191,362° | 281,362° | 304,516° | 0,225 | 0,463 | 0,775 | 98,911°  | 2,031  | 1,31E-01 | 10 |
| 129 | 234,832° | 324,832° | 349,897° | 0,321 | 0,677 | 0,679 | 86,43°   | 4,11   | 1,60E-02 | 0  |



|     |          |          |          |       |       |       |          |        |          |    |
|-----|----------|----------|----------|-------|-------|-------|----------|--------|----------|----|
| 129 | 166,697° | 256,697° | 279,766° | 0,356 | 0,761 | 0,644 | 82,366°  | 5,065  | 6,00E-03 | 0  |
| 129 | 204,342° | 294,342° | 311,868° | 0,15  | 0,304 | 0,85  | 111,58°  | 0,902  | 4,08E-01 | 0  |
| 130 | 152,827° | 242,827° | 252,388° | 0,495 | 1,137 | 0,505 | 67,907°  | 9,818  | 3,12E-05 | 0  |
| 130 | 86,228°  | 176,228° | 193,913° | 0,086 | 0,172 | 0,914 | 126,977° | 0,294  | 7,47E-01 | 10 |
| 130 | 45,61°   | 135,61°  | 158,833° | 0,316 | 0,667 | 0,684 | 86,925°  | 4,004  | 1,70E-02 | 10 |
| 130 | 357,04°  | 87,04°   | 112,107° | 0,397 | 0,865 | 0,603 | 77,856°  | 6,312  | 2,00E-03 | 0  |
| 130 | 322,067° | 52,067°  | 75,136°  | 0,108 | 0,216 | 0,892 | 120,996° | 0,463  | 6,32E-01 | 5  |
| 130 | 89,149°  | 179,149° | 196,543° | 0,684 | 1,911 | 0,316 | 49,937°  | 18,714 | 3,42E-09 | 0  |
| 131 | 47,472°  | 137,472° | 147,197° | 0,189 | 0,385 | 0,811 | 104,602° | 1,427  | 2,41E-01 | 0  |
| 131 | 49,796°  | 139,796° | 157,611° | 0,698 | 1,993 | 0,302 | 48,602°  | 19,479 | 1,99E-09 | 10 |
| 131 | 33,453°  | 123,453° | 146,744° | 0,073 | 0,147 | 0,927 | 131,034° | 0,214  | 8,09E-01 | 10 |
| 131 | 68,514°  | 158,514° | 183,583° | 0,171 | 0,348 | 0,829 | 107,622° | 1,174  | 3,11E-01 | 0  |
| 131 | 63,8°    | 153,8°   | 176,724° | 0,253 | 0,523 | 0,747 | 94,97°   | 2,564  | 7,60E-02 | 5  |
| 131 | 15,156°  | 105,156° | 122,417° | 0,308 | 0,647 | 0,692 | 87,981°  | 3,785  | 2,20E-02 | 0  |
